# Supplementary material
Source: MDPI journal article supplement (https://www.mdpi.com/2079-6412/7/12/229)
Supplement: s1 [file s1]

## Supplementary Material

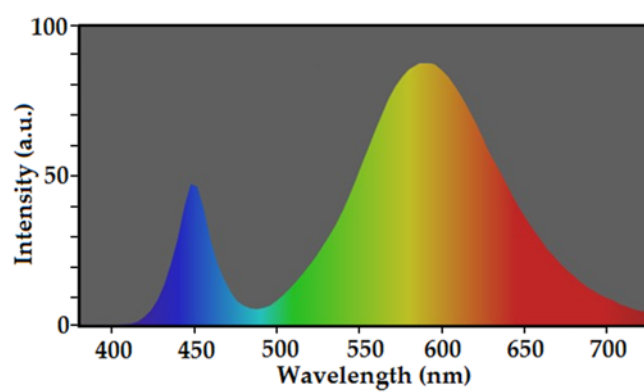

**Figure S1.** The emission spectrum of the LED projectors (characteristics can be found on the producer's website: [superbrightleds.com](http://superbrightleds.com)).
